# Supplementary material
Source: publisher figshare collection journal article supplement (https://frontiersin.figshare.com/ndownloader/files/16104674)

## **SUPPLEMENTARY INFORMATION**

### **Tyrosine dephosphorylation of ASC modulates the activation of the NLRP3 and AIM2 inflammasomes**

Bezaleel Mambwe, Kurt Neo, Hanif Javanmard Khameneh, Keith Weng Kit Leong, Mariasilvia Colantuoni, Maurizio Vacca, Richmond Muimo, and Alessandra Mortellaro

**Supplementary Fig. 1.** Uncropped blots related to the western blots shown in Figures 1 (A-C), 4 (D, E), and 5 (F). The red boxes highlight the regions of the western blots shown in the figures. \* in panel E denotes a non-specific band.

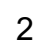

Supplement: Supplementary file [file 16104674]
